# Supplementary material for: In situ synthesis of N-doped carbon nanotubes–BiOCl nanocomposites and their synergistic photocatalytic performance
Source: Royal Society of Chemistry journal article supplement (doi:10.1039/c5ra24149a), 2015-12-23
Supplement: c5ra24149a1.pdf [file c5ra24149a1.pdf]

## Electronic Supplementary Information (ESI)

### In Situ Synthesis of N-doped Carbon Nanotubes–BiOCl Nanocomposites and Their Synergistic Photocatalytic Performance

Lu-Ping Zhu<sup>a,b,\*</sup>, Ling-Ling Wang<sup>a</sup>, Nai-Ci Bing<sup>a</sup>, Peng Li<sup>b</sup>, Li-Jun Wang<sup>a,\*</sup>, Chao Huang<sup>c</sup>, and Gui-Hong Liao<sup>d</sup>

<sup>a</sup>*School of Environmental and Materials Engineering, Shanghai Second Polytechnic University, Shanghai, 201209, China.*

<sup>b</sup>*Environmental Remediation Materials Unit, National Institute for Materials Science (NIMS) 1-1 Namiki, Tsukuba, Ibaraki 305-0044, Japan*

<sup>c</sup>*Department of Physics and Materials Science, City University of Hong Kong, Hong Kong SAR.*

<sup>d</sup>*Technical Institute of Physics and Chemistry, Chinese Academy of Sciences, Beijing 100190, China*

E-mail address: [lpzhu@sspu.edu.cn](mailto:lpzhu@sspu.edu.cn); [ZHU.luping@nims.go.jp](mailto:ZHU.luping@nims.go.jp); [wang\\_lijun@yahoo.cn](mailto:wang_lijun@yahoo.cn).

#### Supporting information table of contents:

**Fig. S1** Plots of  $\ln(C/C_0)$  against time  $t$  of various samples: without catalyst, CN<sub>x</sub>NTs, P25, the as-prepared BiOCl and NCB samples, respectively. ( $C_0 = 10 \text{ mg L}^{-1}$ , 200 mL, and catalyst: 20 mg).

**Fig. S2** Reuse cycles of photodegradation of RhB over the N-doped carbon nanotubes–BiOCl nanocomposites loaded with 2.0 wt% N-doped carbon nanotubes. ( $C_0 = 10 \text{ mg L}^{-1}$ , 200 mL, temperature: room temperature, time: 50 min.) Regeneration: the used catalyst was washed with deionized water and absolute ethanol, and finally dried under vacuum at 50 °C for 8 h.

**Fig. S3.** Comparison of the adsorption efficiency of CN<sub>x</sub>NTs and 2-NCB.

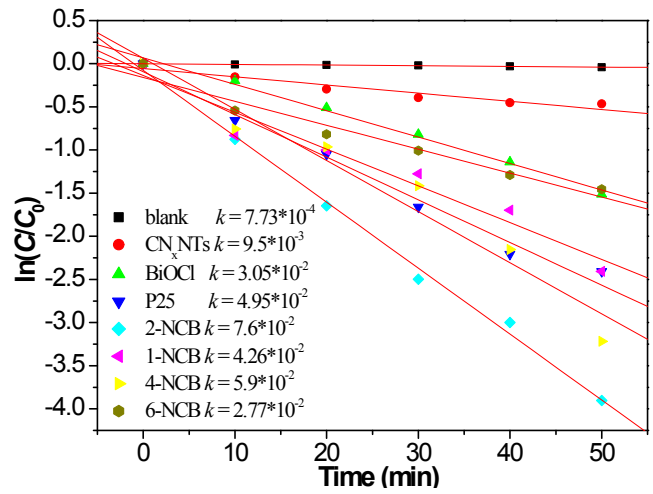

Fig. S1

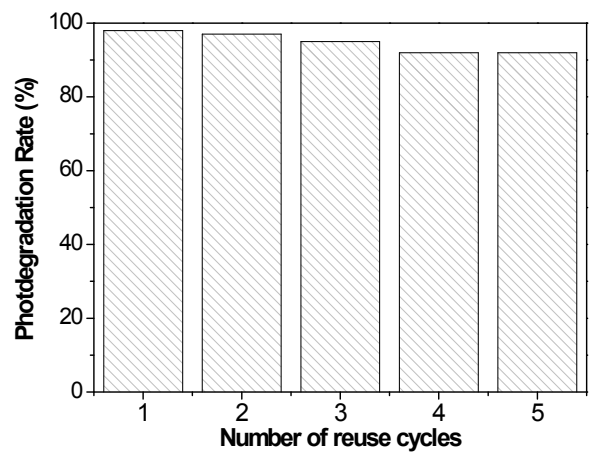

Fig. S2

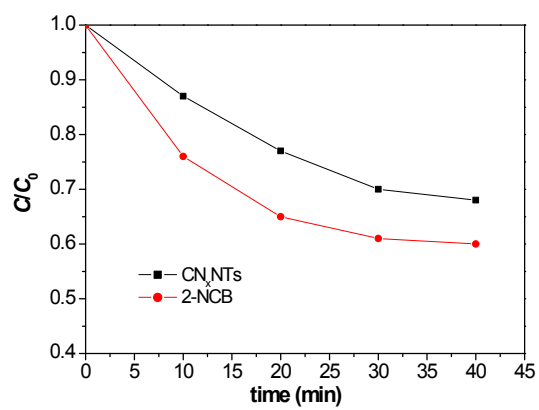

Fig. S3
